# Supplementary material
Source: MDPI journal article supplement (https://www.mdpi.com/1424-2818/15/4/505)
Supplement: s1 [file s1]

Supplementary materials

# Immersion Time Determines Performance of Artificial Habitats in Commercial Harbours by Changing Biodiversity of Colonising Invertebrate Assemblages

Alix Varenne <sup>1,2,\*</sup>, Laura E. Richardson <sup>3,4,\*</sup>, Andrew N. Radford <sup>5</sup>, Francesca Rossi <sup>1,6</sup>, Gilles Lecaillon <sup>2</sup>, Anaïs Gudefin <sup>2</sup>, Lucas Bérenger <sup>7</sup>, Etienne Abadie <sup>2</sup>, Pierre Boissery <sup>8</sup>, Philippe Lenfant <sup>9</sup> and Stephen D. Simpson <sup>3,5</sup>

<sup>1</sup> Centre National de Recherche Scientifique (CNRS), Université Côte d'Azur, ECOSEAS UMR 7035, Parc Valrose, 06108 Nice, France

<sup>2</sup> Ecocean SAS, 1342 Avenue du Toulouse, 34070 Montpellier, France

<sup>3</sup> Biosciences, College of Life and Environmental Sciences, University of Exeter, Geoffrey Pope, Stocker Road, Exeter EX4 4QD, UK

<sup>4</sup> School of Ocean Sciences, Bangor University, Askew St, Menai Bridge LL59 5AB, UK

<sup>5</sup> School of Biological Sciences, University of Bristol, 24 Tyndall Avenue, Bristol BS8 1TQ, UK

<sup>6</sup> Department of Integrative Marine Ecology (EMI), Stazione Zoologica Anton Dohrn—National Institute of Marine Biology, Ecology and Biotechnologies, Genoa Marine Centre, Villa del Principe, Piazza del Principe 4, 16126 Genoa, Italy

<sup>7</sup> Biotope, 22 Boulevard Maréchal Foch, 34140 Mèze, France

<sup>8</sup> Agence de l'Eau Rhône Méditerranée Corse—Délégation Paca Corse, Immeuble Le Noailles, 62 La Canebière, 13001 Marseille, France

<sup>9</sup> Centre de Formation et de Recherche sur les Environnements Méditerranéens, UMR 5110, Université de Perpignan Via Domitia, 66860 Perpignan, France

\* Correspondence: alix.varenne@univ-cotedazur.fr (A.V.); l.richardson@bangor.ac.uk (L.R.)

† These authors contributed equally to this work.

## Supplementary materials

**Table S1.** Surveyed species recorded in Biohut structures in Le Barcarès (BA), Port-Vendres (PV), and Grand Port maritime de Marseille (MA) in 2013 and 2014.

| Phylum     | Class        | Family        | Species                        | Location(s) recorded |
|------------|--------------|---------------|--------------------------------|----------------------|
| Annelida   | Polychaeta   | -             | <i>Polychaeta</i> spp.         | BA, MA               |
| Arthropoda | Malacostraca | Alpheidae     | <i>Athanas nitescens</i>       | BA, MA, PV           |
| Arthropoda | Malacostraca | Carcinidae    | <i>Carcinus</i> spp.           | BA, PV               |
| Arthropoda | Malacostraca | Galatheididae | <i>Galathea squamifera</i>     | MA                   |
| Arthropoda | Malacostraca | Grapsidae     | <i>Pachygrapsus marmoratus</i> | MA, PV               |
| Arthropoda | Malacostraca | Hippolytidae  | <i>Lysmata seticaudata</i>     | BA, MA, PV           |
| Arthropoda | Malacostraca | Inachidae     | <i>Inachus/Macropodia</i> spp. | BA, MA, PV           |
| Arthropoda | Malacostraca | -             | <i>Isopoda</i> spp.            | BA, MA, PV           |
| Arthropoda | Malacostraca | Majidae       | <i>Maja crispata</i>           | BA                   |
| Arthropoda | Malacostraca | Majidae       | <i>Maja</i> spp.               | MA, PV               |
| Arthropoda | Malacostraca | Eriphiidae    | <i>Eriphia verrucosa</i>       | BA, MA, PV           |
| Arthropoda | Malacostraca | Palaemonidae  | <i>Palaemon</i> spp.           | BA, MA, PV           |
| Arthropoda | Malacostraca | Palaemonidae  | <i>Periclimenes</i> spp.       | MA                   |
| Arthropoda | Malacostraca | Porcellanidae | <i>Pisidia</i> spp.            | BA, MA, PV           |

|                        |              |                  |                               |            |
|------------------------|--------------|------------------|-------------------------------|------------|
| <b>Arthropoda</b>      | Malacostraca | Xanthidae        | <i>Xantho poressa</i>         | BA, PV     |
| <b>Echinodermata</b>   | Echinoidea   | Echinidae        | <i>Paracentrotus lividus</i>  | BA, PV     |
| <b>Echinodermata</b>   | Ophiuroidea  | Amphiuridae      | <i>Amphipholis squamata</i>   | BA         |
| <b>Echinodermata</b>   | Ophiuroidea  | Ophiocomidae     | <i>Ophiocomina nigra</i>      | BA         |
| <b>Echinodermata</b>   | Ophiuroidea  | Ophiocomidae     | <i>Ophiopsila aranea</i>      | BA         |
| <b>Echinodermata</b>   | Ophiuroidea  | Ophiidermatidae  | <i>Ophioderma longicauda</i>  | BA         |
| <b>Echinodermata</b>   | Ophiuroidea  | Ophiothricidae   | <i>Ophiothrix fragilis</i>    | BA, PV     |
| <b>Echinodermata</b>   | Ophiuroidea  | -                | <i>Ophiurida</i> spp.         | BA, PV     |
| <b>Mollusca</b>        | Bivalvia     | Anomiidae        | <i>Anomia ephippium</i>       | MA, PV     |
| <b>Mollusca</b>        | Bivalvia     | Cardiidae        | <i>Acanthocardia</i> spp.     | PV         |
| <b>Mollusca</b>        | Bivalvia     | Cardiidae        | <i>Cerastoderma edule</i>     | BA, MA, PV |
| <b>Mollusca</b>        | Bivalvia     | Limidae          | <i>Limaria hians</i>          | BA, MA, PV |
| <b>Mollusca</b>        | Bivalvia     | Mactridae        | <i>Lutraria</i> spp.          | BA, MA, PV |
| <b>Mollusca</b>        | Bivalvia     | Mytilidae        | <i>Modiolarca subpicta</i>    | BA         |
| <b>Mollusca</b>        | Bivalvia     | Ostreidae        | <i>Ostrea edulis</i>          | MA         |
| <b>Mollusca</b>        | Bivalvia     | Pectinidae       | <i>Lissopecten hyalinus</i>   | BA         |
| <b>Mollusca</b>        | Bivalvia     | Pectinidae       | <i>Mimachlamys varia</i>      | BA, MA, PV |
| <b>Mollusca</b>        | Cephalopoda  | Sepiidae         | <i>Sepia officinalis</i>      | PV         |
| <b>Mollusca</b>        | Gastropoda   | Calliostomatidae | <i>Calliostoma zizyphinum</i> | PV         |
| <b>Mollusca</b>        | Gastropoda   | Cerithiidae      | <i>Bittium reticulatum</i>    | BA, PV     |
| <b>Mollusca</b>        | Gastropoda   | Columbellidae    | <i>Columbella rustica</i>     | BA, MA, PV |
| <b>Mollusca</b>        | Gastropoda   | Facelinidae      | <i>Cratena peregrina</i>      | BA         |
| <b>Mollusca</b>        | Gastropoda   | Fissurellidae    | <i>Diodora graeca</i>         | PV         |
| <b>Mollusca</b>        | Gastropoda   | Littorinidae     | <i>Melarhaphe neritoides</i>  | MA         |
| <b>Mollusca</b>        | Gastropoda   | Muricidae        | <i>Hexaplex trunculus</i>     | BA         |
| <b>Mollusca</b>        | Gastropoda   | Muricidae        | <i>Ocenebra erinaceus</i>     | BA, MA, PV |
| <b>Mollusca</b>        | Gastropoda   | Muricidae        | <i>Ocenebrina edwardsii</i>   | BA, PV     |
| <b>Mollusca</b>        | Gastropoda   | Muricidae        | <i>Thophonopsis muricatus</i> | PV         |
| <b>Mollusca</b>        | Gastropoda   | Nassariidae      | <i>Nassarius incrassatus</i>  | BA, MA, PV |
| <b>Mollusca</b>        | Gastropoda   | Nassariidae      | <i>Nassarius</i> spp.         | BA, MA, PV |
| <b>Mollusca</b>        | Gastropoda   | Plyceridae       | <i>Polycera quadrilineata</i> | BA         |
| <b>Mollusca</b>        | Gastropoda   | Trochidae        | <i>Gibbula magus</i>          | BA, PV     |
| <b>Platyhelminthes</b> | Turbellaria  | Discocelidae     | <i>Discocelis tigrina</i>     | MA, PV     |
| <b>Platyhelminthes</b> | Turbellaria  | Euryleptidae     | <i>Pseudoceros maximus</i>    | MA         |

**Table S2.** Invertebrate species surveyed between 2013 and 2017 in artificial structures (Dock Biohut: D; Pontoon Biohut, P) installed within 21 harbours, in 19 cities in France and Monaco during monitoring (total = 115 spp.).

| Phylum          | Class      | Family       | Species                   | Biohut type |
|-----------------|------------|--------------|---------------------------|-------------|
| <b>Annelida</b> | Echiura    | Bonelliidae  | <i>Bonellia viridis</i>   | D, P        |
| <b>Annelida</b> | Polychaeta | Arenicolidae | <i>Arenicola</i> spp.     | P           |
| <b>Annelida</b> | Polychaeta | Eunicidae    | <i>Leodice harassii</i>   | P           |
| <b>Annelida</b> | Polychaeta | Eunicidae    | <i>Leodice torquata</i>   | P           |
| <b>Annelida</b> | Polychaeta | Hesionidae   | <i>Hesione pantherina</i> | D, P        |
| <b>Annelida</b> | Polychaeta | Nereidae     | <i>Nereis</i> spp.        | P           |
| <b>Annelida</b> | Polychaeta | -            | <i>Polychaeta</i> spp.    | D, P        |

|                      |               |                 |                                |      |
|----------------------|---------------|-----------------|--------------------------------|------|
| <b>Arthropoda</b>    | Malacostraca  | Alpheidae       | <i>Alpheus macrocheles</i>     | D, P |
| <b>Arthropoda</b>    | Malacostraca  | Alpheidae       | <i>Athanas nitescens</i>       | D, P |
| <b>Arthropoda</b>    | Malacostraca  | -               | <i>Brachyura</i> spp.          | P    |
| <b>Arthropoda</b>    | Malacostraca  | Carcinidae      | <i>Carcinus aestuarii</i>      | D, P |
| <b>Arthropoda</b>    | Malacostraca  | Carcinidae      | <i>Carcinus</i> spp.           | D, P |
| <b>Arthropoda</b>    | Malacostraca  | Dromiidae       | <i>Dromia personata</i>        | D, P |
| <b>Arthropoda</b>    | Malacostraca  | Galatheididae   | <i>Galathea</i> spp.           | P    |
| <b>Arthropoda</b>    | Malacostraca  | Galatheididae   | <i>Galathea squamifera</i>     | D    |
| <b>Arthropoda</b>    | Malacostraca  | Gammaridae      | <i>Gammarus</i> spp.           | P    |
| <b>Arthropoda</b>    | Malacostraca  | Grapsidae       | <i>Pachygrapsus marmoratus</i> | D, P |
| <b>Arthropoda</b>    | Malacostraca  | Hippolytidae    | <i>Hippolyte</i> spp.          | P    |
| <b>Arthropoda</b>    | Malacostraca  | Hippolytidae    | <i>Lysmata seticaudata</i>     | D, P |
| <b>Arthropoda</b>    | Malacostraca  | Inachidae       | <i>Inachus/Macropodia</i> spp. | D, P |
| <b>Arthropoda</b>    | Malacostraca  | -               | <i>Isopoda</i> spp.            | D, P |
| <b>Arthropoda</b>    | Malacostraca  | Leucosiidae     | <i>Ebalia</i> spp.             | D    |
| <b>Arthropoda</b>    | Malacostraca  | Majidae         | <i>Macropodia</i> spp.         | P    |
| <b>Arthropoda</b>    | Malacostraca  | Majidae         | <i>Maja crispata</i>           | D    |
| <b>Arthropoda</b>    | Malacostraca  | Majidae         | <i>Maja</i> spp.               | D, P |
| <b>Arthropoda</b>    | Malacostraca  | -               | <i>Malacostraca</i> spp.       | P    |
| <b>Arthropoda</b>    | Malacostraca  | Eriphiidae      | <i>Eriphia verrucosa</i>       | D, P |
| <b>Arthropoda</b>    | Malacostraca  | Mysidacea       | <i>Mysidacea</i> spp.          | P    |
| <b>Arthropoda</b>    | Malacostraca  | Paguridae       | <i>Pagurus anachoretus</i>     | D    |
| <b>Arthropoda</b>    | Malacostraca  | Palaemonidae    | <i>Palaemon</i> spp.           | D, P |
| <b>Arthropoda</b>    | Malacostraca  | Palaemonidae    | <i>Periclimenes</i> spp.       | D    |
| <b>Arthropoda</b>    | Malacostraca  | Polybiidae      | <i>Liocarcinus</i> spp.        | D    |
| <b>Arthropoda</b>    | Malacostraca  | Porcellanidae   | <i>Pisidia longicornis</i>     | P    |
| <b>Arthropoda</b>    | Malacostraca  | Porcellanidae   | <i>Pisidia longimana</i>       | P    |
| <b>Arthropoda</b>    | Malacostraca  | Porcellanidae   | <i>Pisidia</i> spp.            | D, P |
| <b>Arthropoda</b>    | Malacostraca  | Porcellanidae   | <i>Porcellana platycheles</i>  | P    |
| <b>Arthropoda</b>    | Malacostraca  | Processidae     | <i>Processa</i> spp.           | D, P |
| <b>Arthropoda</b>    | Malacostraca  | Sphaeromatidae  | <i>Sphaeromatidae</i> spp.     | P    |
| <b>Arthropoda</b>    | Malacostraca  | Xanthidae       | <i>Xantho poressa</i>          | D    |
| <b>Echinodermata</b> | Asteroidea    | Asteriidae      | <i>Marthasterias glacialis</i> | D    |
| <b>Echinodermata</b> | Asteroidea    | Asterinidae     | <i>Asterina gibbosa</i>        | D, P |
| <b>Echinodermata</b> | Asteroidea    | Astropectinidae | <i>Astropecten irregularis</i> | D    |
| <b>Echinodermata</b> | Crinoidea     | Antedonidae     | <i>Antedon</i> spp.            | P    |
| <b>Echinodermata</b> | Echinoidea    | Echinidae       | <i>Gracilechinus acutus</i>    | P    |
| <b>Echinodermata</b> | Echinoidea    | Echinidae       | <i>Paracentrotus lividus</i>   | D, P |
| <b>Echinodermata</b> | Holothuroidea | Holothuroiidea  | <i>Holothuria forskali</i>     | P    |
| <b>Echinodermata</b> | Holothuroidea | Holothuroiidea  | <i>Holothuria</i> spp.         | D, P |
| <b>Echinodermata</b> | Ophiuroidea   | Amphiuridae     | <i>Amphipholis squamata</i>    | D, P |
| <b>Echinodermata</b> | Ophiuroidea   | Ophiocomidae    | <i>Ophiocomina nigra</i>       | D    |
| <b>Echinodermata</b> | Ophiuroidea   | Ophiocomidae    | <i>Ophiopsila aranea</i>       | D, P |
| <b>Echinodermata</b> | Ophiuroidea   | Ophiidermatidae | <i>Ophioderma longicauda</i>   | D, P |
| <b>Echinodermata</b> | Ophiuroidea   | Ophiothricidae  | <i>Ophiothrix fragilis</i>     | D, P |
| <b>Echinodermata</b> | Ophiuroidea   | -               | <i>Ophiurida</i> spp.          | D    |
| <b>Mollusca</b>      | Bivalvia      | Anomiidae       | <i>Anomia ephippium</i>        | D, P |

|          |             |                  |                                |      |
|----------|-------------|------------------|--------------------------------|------|
| Mollusca | Bivalvia    | Arcidae          | <i>Arca noae</i>               | D, P |
| Mollusca | Bivalvia    | -                | <i>Bivalvia</i> spp.           | P    |
| Mollusca | Bivalvia    | Cardiidae        | <i>Acanthocardia</i> spp.      | D, P |
| Mollusca | Bivalvia    | Cardiidae        | <i>Cerastoderma edule</i>      | D, P |
| Mollusca | Bivalvia    | Cardiidae        | <i>Cerastoderma glaucum</i>    | P    |
| Mollusca | Bivalvia    | Cardiidae        | <i>Parvicardium scriptum</i>   | D, P |
| Mollusca | Bivalvia    | Donacidae        | <i>Donax</i> spp.              | D, P |
| Mollusca | Bivalvia    | Limidae          | <i>Lima lima</i>               | P    |
| Mollusca | Bivalvia    | Limidae          | <i>Limaria hians</i>           | D, P |
| Mollusca | Bivalvia    | Mactridae        | <i>Lutraria</i> spp.           | D, P |
| Mollusca | Bivalvia    | Mytilidae        | <i>Modiolarca subpicta</i>     | D, P |
| Mollusca | Bivalvia    | Ostreidae        | <i>Ostrea edulis</i>           | D, P |
| Mollusca | Bivalvia    | Ostreidae        | <i>Ostreidae</i> spp.          | P    |
| Mollusca | Bivalvia    | Pectinidae       | <i>Lissopecten hyalinus</i>    | D    |
| Mollusca | Bivalvia    | Pectinidae       | <i>Mimachlamys varia</i>       | D, P |
| Mollusca | Bivalvia    | Thraciidae       | <i>Thracia</i> spp.            | P    |
| Mollusca | Bivalvia    | Veneridae        | <i>Chamalea gallina</i>        | P    |
| Mollusca | Bivalvia    | Verenidae        | <i>Callista chione</i>         | P    |
| Mollusca | Cephalopoda | Sepiidae         | <i>Sepia officinalis</i>       | D    |
| Mollusca | Gastropoda  | Buccinidae       | <i>Buccinum humphreysianum</i> | D    |
| Mollusca | Gastropoda  | Calliostomatidae | <i>Calliostoma zizyphinum</i>  | D, P |
| Mollusca | Gastropoda  | Cerithiidae      | <i>Bittium reticulatum</i>     | D, P |
| Mollusca | Gastropoda  | Cerithiidae      | <i>Cerithium vulgatum</i>      | D    |
| Mollusca | Gastropoda  | Columbellidae    | <i>Columbella rustica</i>      | D, P |
| Mollusca | Gastropoda  | Dorididae        | <i>Doris verrucosa</i>         | D    |
| Mollusca | Gastropoda  | Epitonidae       | <i>Epitonium clathrus</i>      | P    |
| Mollusca | Gastropoda  | Facelinidae      | <i>Cratena peregrina</i>       | D, P |
| Mollusca | Gastropoda  | Fissurellidae    | <i>Diodora graeca</i>          | D    |
| Mollusca | Gastropoda  | Flabellinidae    | <i>Flabellina</i> spp.         | P    |
| Mollusca | Gastropoda  | -                | <i>Gastropoda</i> spp.         | D    |
| Mollusca | Gastropoda  | Goniodorididae   | <i>Goniodoris castanea</i>     | P    |
| Mollusca | Gastropoda  | Haliotidae       | <i>Haliotis tuberculata</i>    | D    |
| Mollusca | Gastropoda  | Haminoeidae      | <i>Haminoea</i> spp.           | D    |
| Mollusca | Gastropoda  | Hydrobiidae      | <i>Peringia ulvae</i>          | P    |
| Mollusca | Gastropoda  | Littorinidae     | <i>Melarhaphe neritoides</i>   | D    |
| Mollusca | Gastropoda  | Muricidae        | <i>Bolinus brandaris</i>       | D    |
| Mollusca | Gastropoda  | Muricidae        | <i>Hexaplex trunculus</i>      | D    |
| Mollusca | Gastropoda  | Muricidae        | <i>Ocenebra erinaceus</i>      | D    |
| Mollusca | Gastropoda  | Muricidae        | <i>Ocenebrina edwardsii</i>    | D, P |
| Mollusca | Gastropoda  | Muricidae        | <i>Thophonopsis muricatus</i>  | D, P |
| Mollusca | Gastropoda  | Nassariidae      | <i>Nassarius corniculum</i>    | D, P |
| Mollusca | Gastropoda  | Nassariidae      | <i>Nassarius incrassatus</i>   | D, P |
| Mollusca | Gastropoda  | Nassariidae      | <i>Nassarius</i> spp.          | D, P |
| Mollusca | Gastropoda  | Nassariidae      | <i>Tritia</i> spp.             | D, P |
| Mollusca | Gastropoda  | Naticidae        | <i>Euspira</i> spp.            | D    |
| Mollusca | Gastropoda  | Patellidae       | <i>Patella</i> spp.            | D, P |
| Mollusca | Gastropoda  | Plyceridae       | <i>Polycera hedgpethi</i>      | D, P |

|                        |             |                   |                                   |      |
|------------------------|-------------|-------------------|-----------------------------------|------|
| <b>Mollusca</b>        | Gastropoda  | Plyceridae        | <i>Polycera quadrilineata</i>     | D, P |
| <b>Mollusca</b>        | Gastropoda  | Trochidae         | <i>Gibbula magus</i>              | D, P |
| <b>Mollusca</b>        | Gastropoda  | Trochidae         | <i>Gibbula umbilicalis</i>        | D, P |
| <b>Mollusca</b>        | Gastropoda  | Trochidae         | <i>Jujubinus gravinae</i>         | D    |
| <b>Mollusca</b>        | Gastropoda  | Trochidae         | <i>Jujubinus striatus</i>         | D, P |
| <b>Mollusca</b>        | Gastropoda  | Trochidae         | <i>Trochidae</i> spp.             | D    |
| <b>Mollusca</b>        | Gastropoda  | Turritellidae     | <i>Turritella communis</i>        | D    |
| <b>Platyhelminthes</b> | Turbellaria | Discocelidae      | <i>Discocelis tigrina</i>         | D, P |
| <b>Platyhelminthes</b> | Turbellaria | Euryleptidae      | <i>Oligocladus sanguinolentus</i> | P    |
| <b>Platyhelminthes</b> | Turbellaria | Euryleptidae      | <i>Prostheceraeus moseleyi</i>    | P    |
| <b>Platyhelminthes</b> | Turbellaria | Euryleptidae      | <i>Pseudoceros maximus</i>        | D, P |
| <b>Platyhelminthes</b> | Turbellaria | Pseudocerotidae   | <i>Thysanozoon brocchii</i>       | D, P |
| <b>Platyhelminthes</b> | Turbellaria | Stylocomoplanidae | <i>Comoplana agilis</i>           | P    |

**Table S3.** Temporal comparisons (with 95% confidence intervals: CI) of invertebrate assemblages in Dock Biohut across harbours (random factor) in Year 1 to Year 2 (linear mixed effects models). Significant metrics shown in bold.

| Response                      | Contrast    | Lower CI     | Upper CI    | Test stat   | df          | p                 |
|-------------------------------|-------------|--------------|-------------|-------------|-------------|-------------------|
| <b>Total abundance</b>        | <b>1.69</b> | <b>1.08</b>  | <b>2.66</b> | <b>2.36</b> | <b>1,42</b> | <b>0.02</b>       |
| <b>Species richness</b>       | <b>1.28</b> | <b>1.03</b>  | <b>1.58</b> | <b>2.28</b> | <b>1,42</b> | <b>0.02</b>       |
| Shannon (H)                   | 0.14        | -0.26        | 0.54        | 0.70        | 1,42        | 0.48              |
| <b>Pielou's evenness (J)</b>  | <b>0.08</b> | <b>0.002</b> | <b>0.16</b> | <b>2.07</b> | <b>1,40</b> | <b>0.04</b>       |
| <b>Malacostraca abundance</b> | <b>3.69</b> | <b>2.06</b>  | <b>6.63</b> | <b>4.50</b> | <b>1,42</b> | <b>&lt;0.0001</b> |
| Bivalvia abundance            | 1.16        | 0.60         | 2.24        | 0.45        | 1,42        | 0.66              |
| Gastropoda abundance          | 0.99        | 0.54         | 1.80        | -0.04       | 1,42        | 0.97              |
| Ophiuroidea abundance         | 0.84        | 0.27         | 2.66        | -0.31       | 1,42        | 0.76              |

**Table S4.** Mean  $\pm$  SE total abundance, biodiversity, and abundance of classes of invertebrates surveyed within Biohut structures in year 1 and year 2 since installation.

|                               | Year 1           | Year 2            |
|-------------------------------|------------------|-------------------|
| <b>Total abundance</b>        | 46.30 $\pm$ 7.93 | 75.38 $\pm$ 11.25 |
| <b>Species richness</b>       | 7.20 $\pm$ 0.42  | 9.13 $\pm$ 1.15   |
| <b>Shannon diversity (H)</b>  | 1.44 $\pm$ 0.08  | 1.58 $\pm$ 0.18   |
| <b>Pielou's evenness (J)</b>  | 0.74 $\pm$ 0.03  | 0.82 $\pm$ 0.02   |
| <b>Malacostraca abundance</b> | 10.97 $\pm$ 1.90 | 39.00 $\pm$ 5.81  |
| <b>Bivalvia abundance</b>     | 6.33 $\pm$ 1.53  | 8.13 $\pm$ 2.07   |
| <b>Gastropoda abundance</b>   | 13.70 $\pm$ 3.83 | 17.50 $\pm$ 6.16  |
| <b>Ophiuroidea abundance</b>  | 14.73 $\pm$ 7.15 | 7.50 $\pm$ 3.79   |

**Table S5.** Temporal comparisons (with 95% confidence intervals: CI) of potentially exploited species surveyed contributing >5% of the total abundance of invertebrate assemblages in surveyed Biohuts in Year 1 and Year 2 (linear mixed effects models) [30].

| Response                                  | Contrast | Lower CI | Upper CI | Test stat | df   | p    |
|-------------------------------------------|----------|----------|----------|-----------|------|------|
| <b><i>Palaemon</i> spp. abundance</b>     | 1.81     | 0.81     | 4.07     | 1.49      | 1,42 | 0.14 |
| <b><i>Mimachlamys varia</i> abundance</b> | 1.10     | 0.52     | 2.31     | 0.25      | 1,42 | 0.80 |

**Table S6.** Mean  $\pm$  SE total abundance of commercially exploitable species in surveyed Dock Biohut structures in Year 1 and Year 2 [30].

|                              | Year 1          | Year 2          |
|------------------------------|-----------------|-----------------|
| <i>Carcinus</i> spp.         | 0.47 $\pm$ 0.23 | 0.00 $\pm$ 0.00 |
| <i>Cerastoderma edule</i>    | 0.17 $\pm$ 0.07 | 0.00 $\pm$ 0.00 |
| <i>Galathea squamifera</i>   | 0.13 $\pm$ 0.08 | 0.19 $\pm$ 0.14 |
| <i>Melarhaphe neritoides</i> | 0.03 $\pm$ 0.03 | 0.00 $\pm$ 0.00 |
| <i>Mimachlamys varia</i>     | 5.63 $\pm$ 1.50 | 6.63 $\pm$ 1.70 |
| <i>Ostrea edulis</i>         | 0.03 $\pm$ 0.03 | 0.00 $\pm$ 0.00 |
| <i>Palaemon</i> spp.         | 4.60 $\pm$ 1.50 | 7.81 $\pm$ 2.00 |
| <i>Paracentrotus lividus</i> | 0.30 $\pm$ 0.16 | 2.63 $\pm$ 1.06 |
| <i>Periclimenes</i> spp.     | 0.00 $\pm$ 0.00 | 0.75 $\pm$ 0.44 |
| <i>Polychaeta</i> spp.       | 0.00 $\pm$ 0.00 | 0.56 $\pm$ 0.30 |
| <i>Sepia officinalis</i>     | 0.07 $\pm$ 0.05 | 0.00 $\pm$ 0.00 |
